# Supplementary material for: Starvation during pregnancy impairs fetal oogenesis and folliculogenesis in offspring in the mouse
Source: PubMed Central journal article supplement (PMC5906686; doi:10.1038/s41419-018-0492-2), 2018-04-18

# Supplemental Figure S1

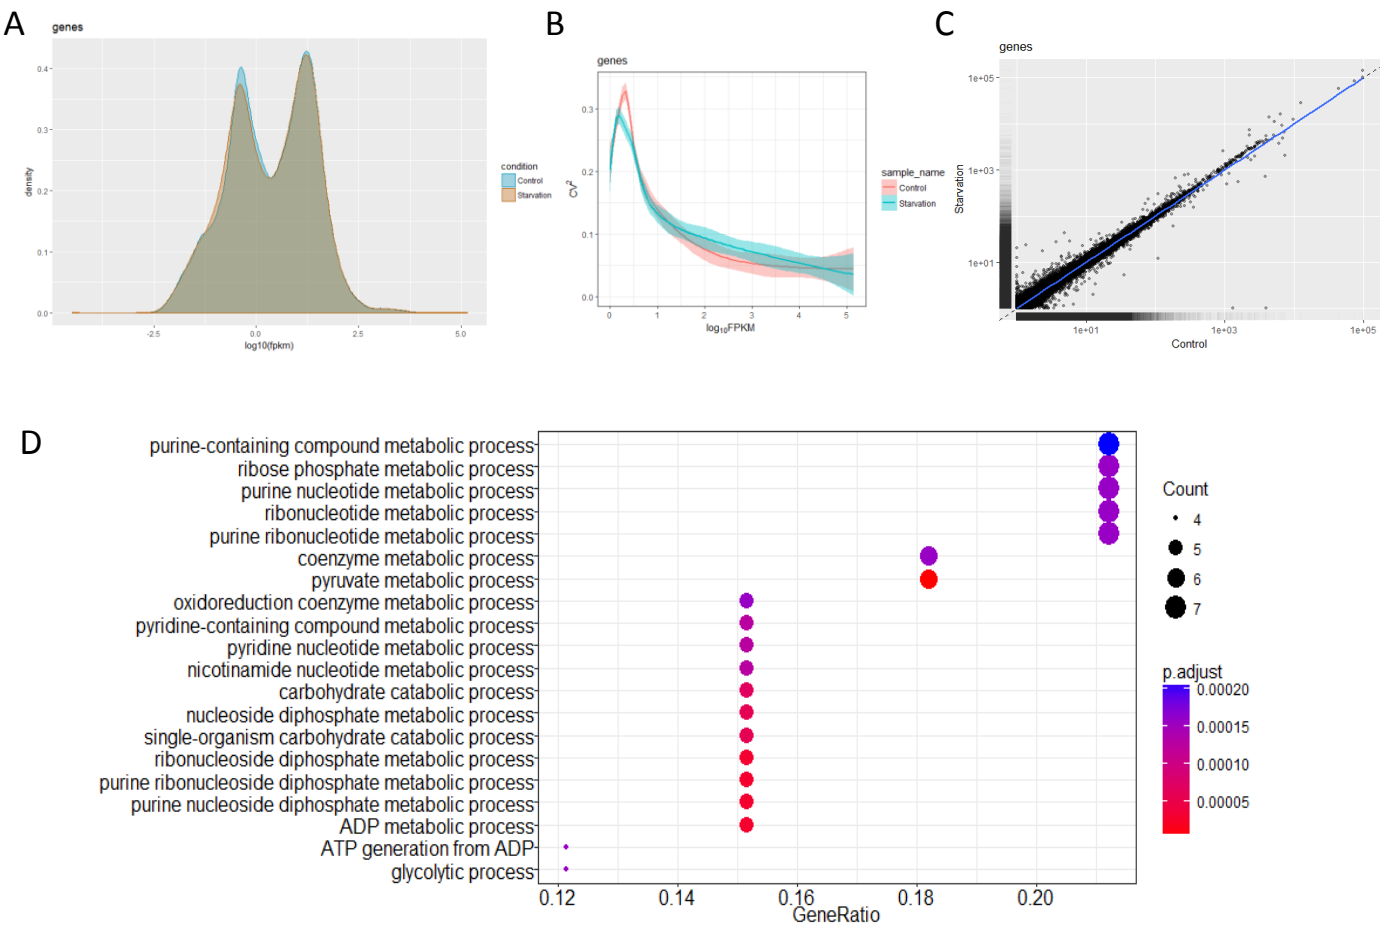

Supplement: 41419_2018_492_MOESM1_ESM.pdf [file 41419_2018_492_MOESM1_ESM.pdf]
